# Supplementary material for: Inositol triphosphate–triggered calcium release from the endoplasmic reticulum induces lysosome biogenesis via TFEB/TFE3
Source: PubMed Central journal article supplement (PMC8914386; doi:10.1016/j.jbc.2022.101740), 2022-02-16
Supplement: mmc1.pdf [file mmc1.pdf]

## Supplementary Information for

# Inositol triphosphate-triggered calcium release from the endoplasmic reticulum induces lysosome biogenesis via TFEB/ TFE3

Mouhannad Malek, Anna M. Wawrzyniak, Michael Ebner, Dmytro Puchkov, Volker Haucke

## Inventory of supplementary items

### Supplementary figures

Supplementary figure 1 | INPP5A loss does not impact on the distribution or cellular levels of the ER, early endosomes, or cell surface  $\beta$ 1-integrins and leads to Golgi compaction.

Supplementary figure 2 | INPP5A loss does not affect mTORC1 or ERK signaling.

Supplementary figure 3 | INPP5A-depleted cells do not suffer from ER stress.

Supplementary figure 4 | Lysosome accumulation in INPP5A-depleted cells is further aggravated by loss of Mucolipin 1.

Supplementary figure 5 | Phospholipase C-mediated generation of IP<sub>3</sub> triggers lysosome biogenesis via activation of calcineurin.

### Supplementary tables

Supplementary table 1 | Oligonucleotides used in this study

Supplementary table 2 | Antibodies used in this study

Supplementary figures

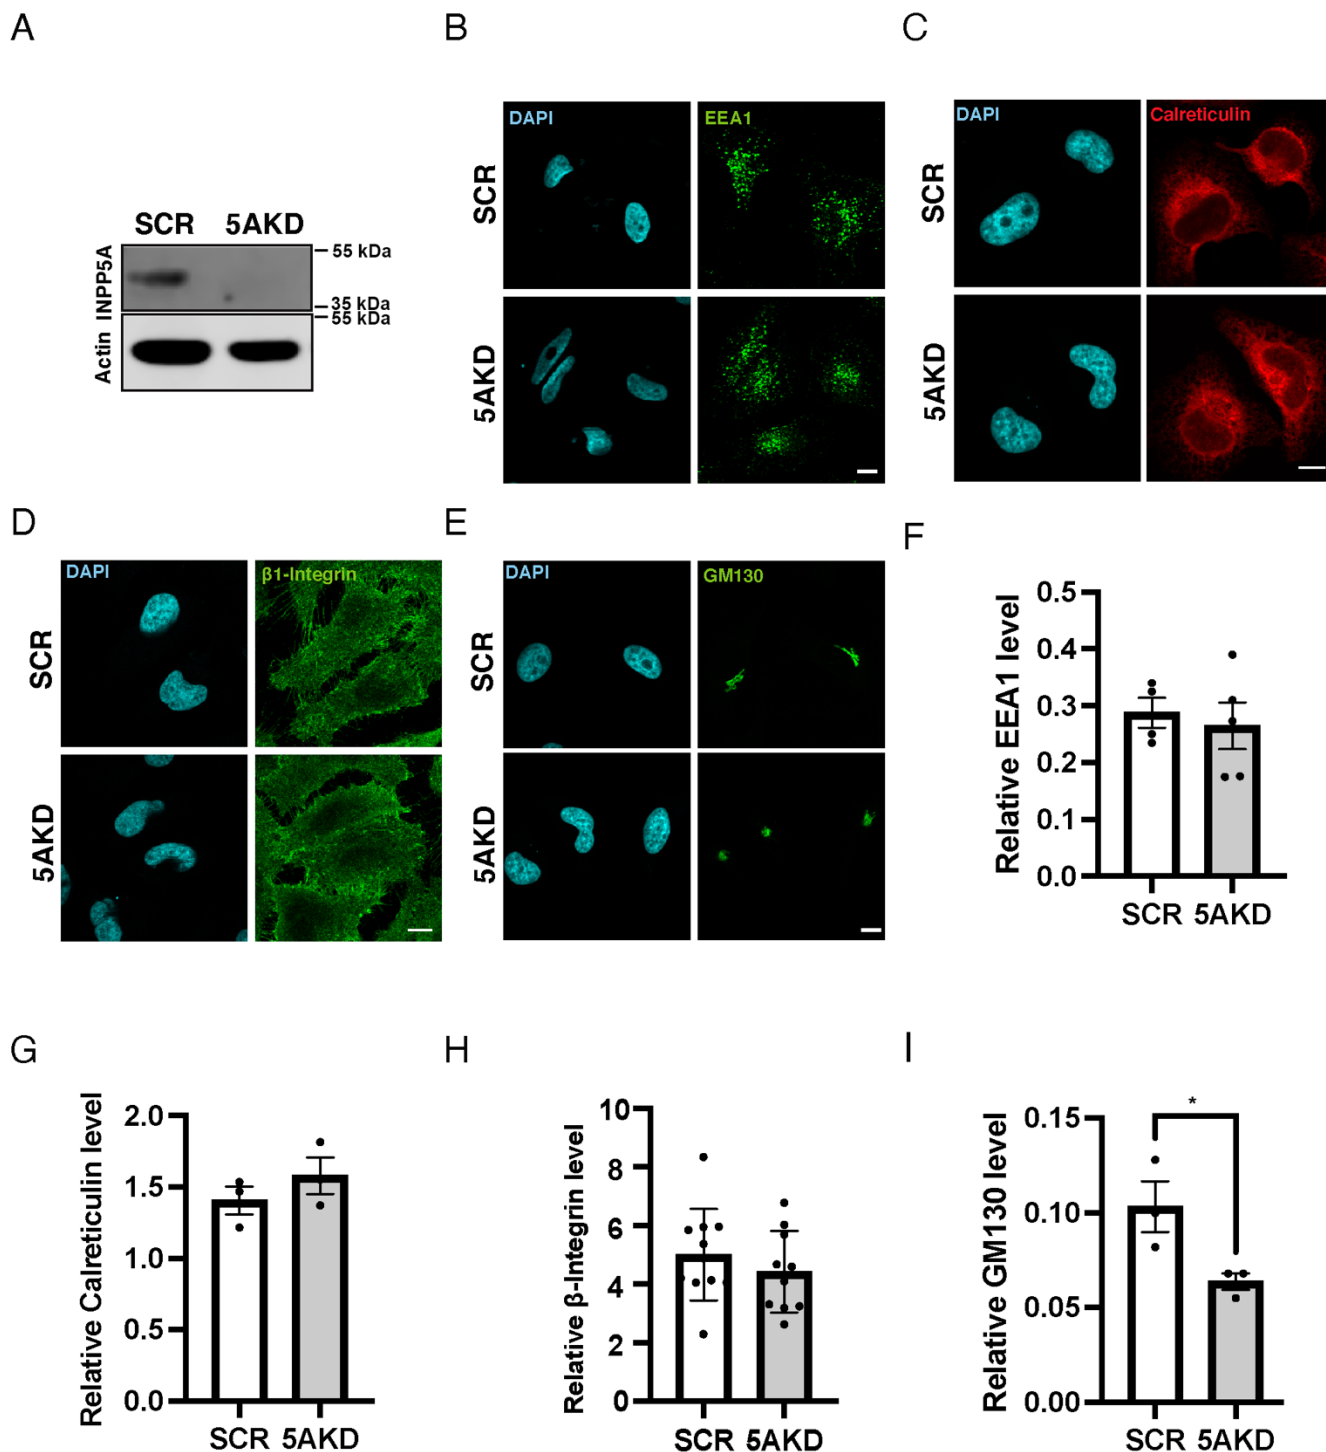

**Supplementary figure 1 | INPP5A loss does not impact on the distribution or cellular levels of the ER, early endosomes, or cell surface  $\beta$ 1-integrins and leads to Golgi compaction.** (A) Representative immunoblot analysis of HeLa cells treated with control (SCR) or INPP5A siRNA (5AKD). Immunoblots were decorated with antibodies against INPP5A and actin. (B-E) Representative confocal images of fixed HeLa cells treated with control (SCR) or INPP5A siRNA (5AKD) and stained for EEA1 (green, B), calreticulin (red, C),  $\beta$ 1-integrin (green, D), or GM130 (green, E). Blue, DAPI-stained nuclei. Scale bar, 10  $\mu$ m. Note that the views in panels C and E are derived from the same experiment, in which cells were triply stained for DAPI, calreticulin (C) and GM130 (E). (F-I) Quantification of organelle levels as exemplified by representative data in B-E. Unpaired t-test: EEA1:  $p=0.6756$ ,  $t=0.4366$ ,  $df=7$ . Calreticulin:  $p=0.3461$ ,  $t=1.067$ ,  $df=4$ . GM130:  $p=0.484$ ,  $t=2.809$ ,  $df=4$ .  $\beta$ 1-integrin:  $p=0.3785$ ,  $t=0.9017$ ,  $df=19$ . Data for EEA1 represent 5 independent experiments, for GM130 and calreticulin:  $n=3$ ,  $\beta$ 1-integrin:  $n=10$ .

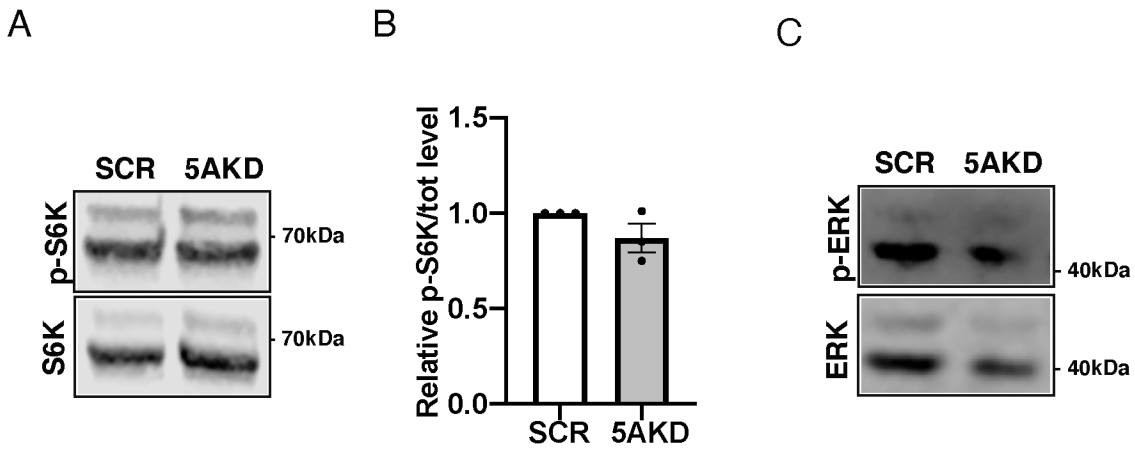

**Supplementary figure 2 | INPP5A loss does not affect mTORC1 or ERK signaling.** (A,C) Representative immunoblot analysis of HeLa cells treated with control (SCR) or INPP5A siRNA (5AKD). Immunoblots were decorated with antibodies against phospho-S6K1 (p-S6K) and total S6K1 (S6K), phospho-ERK(p-ERK) and total ERK (ERK). (B) Quantification of pS6K1/ total S6K1 levels as exemplified by representative shown in (A) from n=3 independent experiments. Data for SCR-control siRNA-treated cells were set to 1. One sample student's t-test p-S6K: p=0.3457, t=1.224, df=2.

A

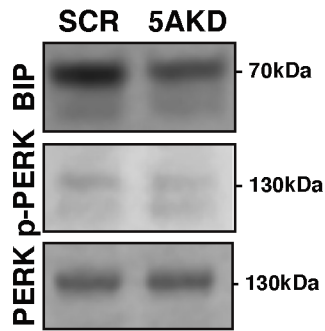

B

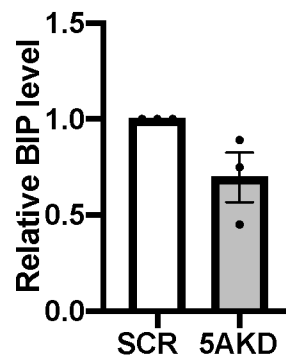

C

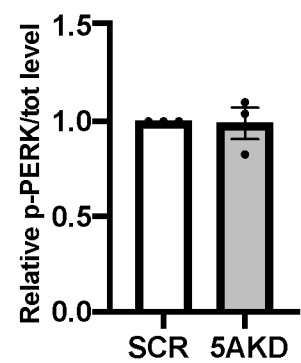

**Supplementary figure 3 | INPP5A-depleted cells do not suffer from ER stress.** (A) Representative immunoblot analysis of HeLa cells treated with control (SCR) or INPP5A siRNA (5AKD). Immunoblots were decorated with antibodies against BIP, phospho-PERK and total PERK. (B,C) Quantification of BIP (B) and pPERK/ total ERK (C) levels as exemplified by representative data shown in (A) from  $n=3$  independent experiments. Data for SCR-control siRNA-treated cells were set to 1. One sample student's t-test p-PERK:  $p=0.4425$ ,  $t=0.9497$ ,  $df=2$ . BIP:  $p=1.311$ ,  $t=2.482$ ,  $df=2$ .

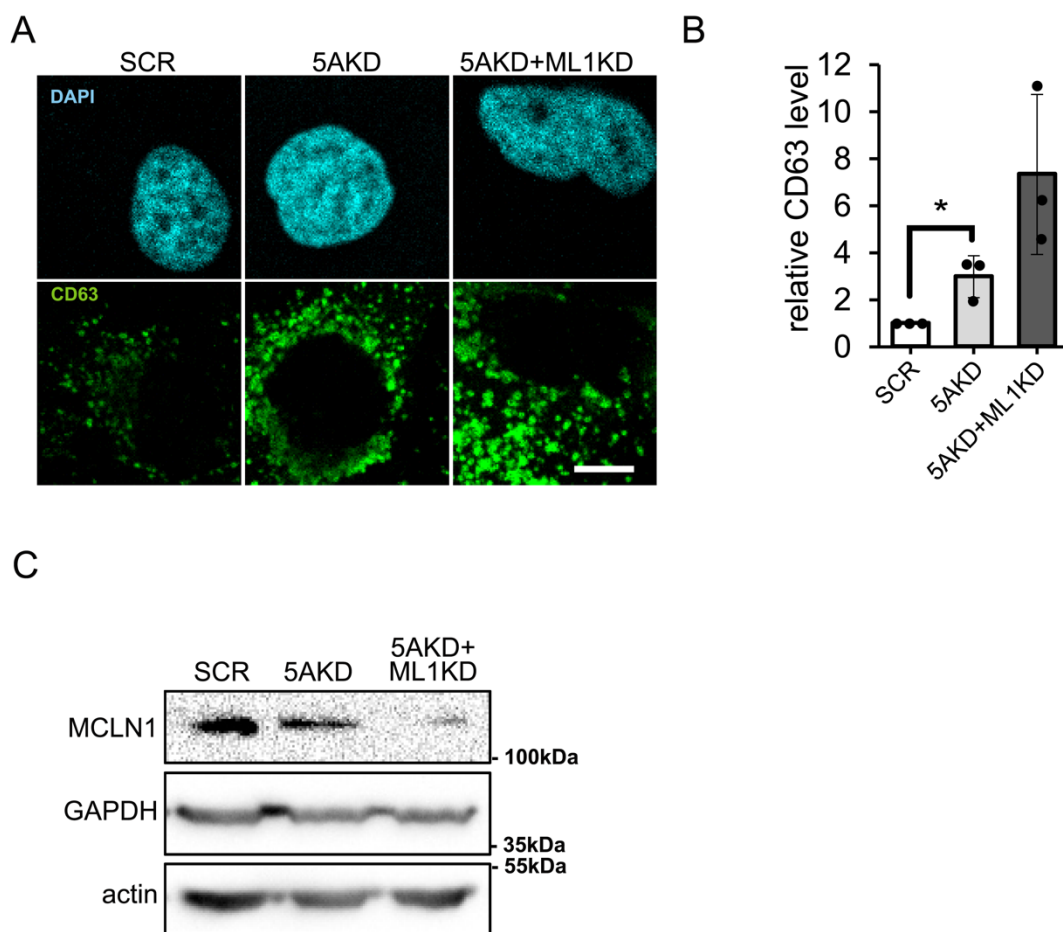

**Supplementary figure 4 | Lysosome accumulation in INPP5A-depleted cells is further aggravated by loss of Mucolipin 1.** (A) Representative confocal images of fixed HeLa cells treated with control (SCR), INPP5A siRNA (5AKD), or INPP5A and mucolipin 1 siRNA (5AKD+ML1KD) and stained for CD63 (green). Blue, DAPI-stained nuclei. Scale bar, 10  $\mu$ m. (B) Quantification of organelle levels as exemplified by representative data in A. Unpaired t-test:  $p=0.018$ . (C) Immunoblot analysis of HeLa cells treated as in (A). Immunoblots were decorated with antibodies against mucolipin 1 (MCLN1), GAPDH, and  $\beta$ -actin.

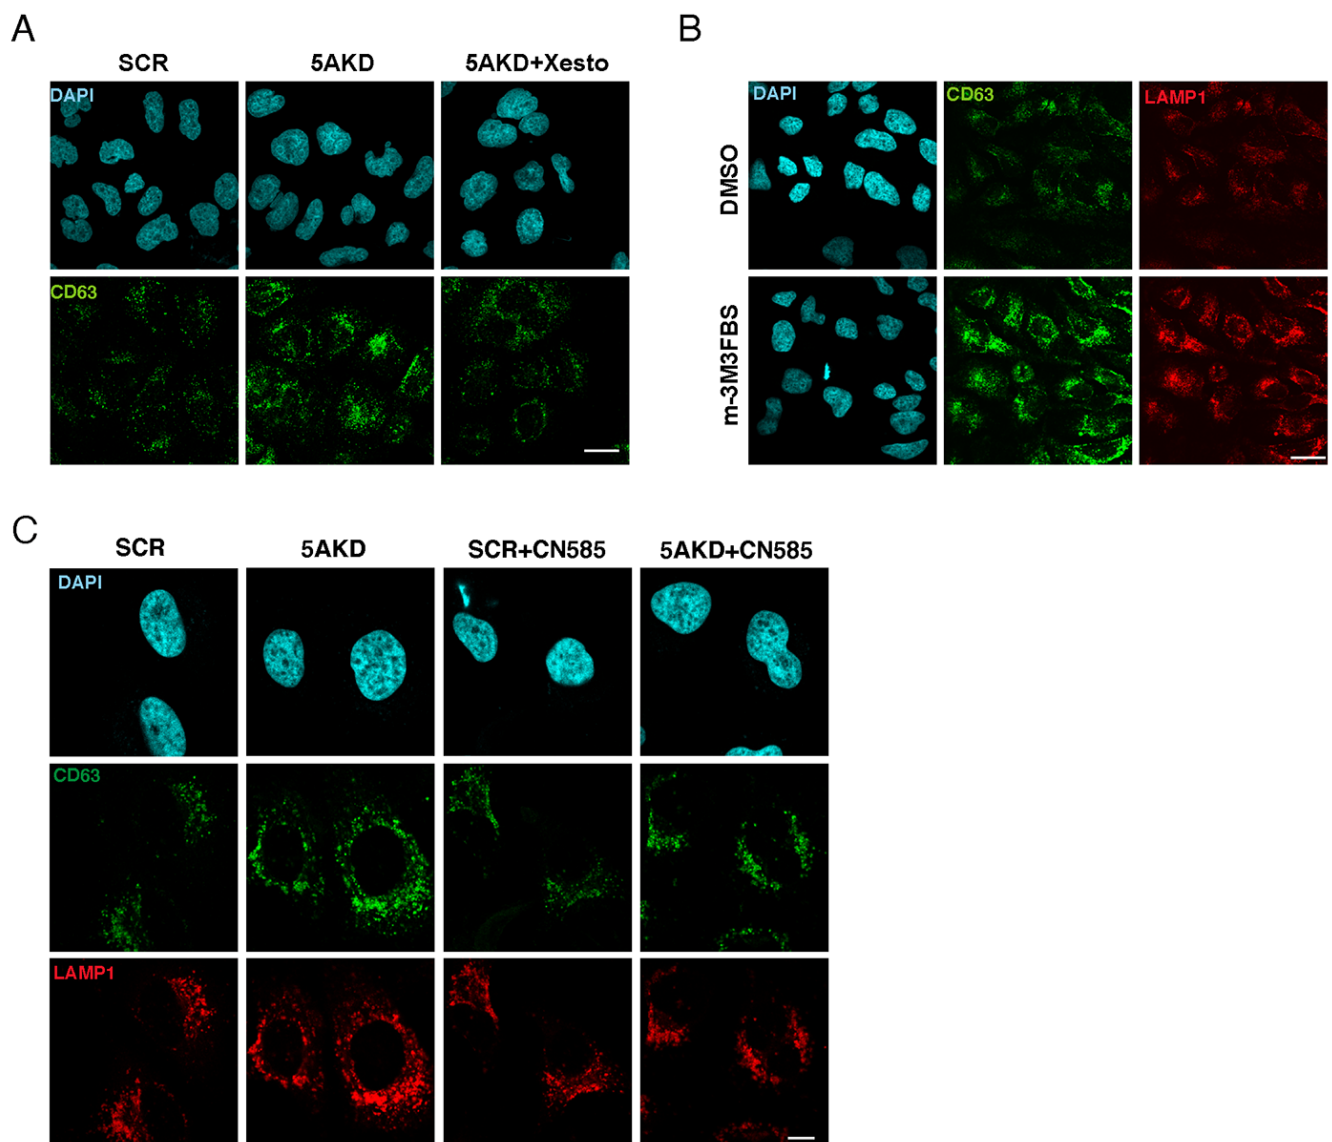

**Supplementary figure 5 | Phospholipase C-mediated generation of IP<sub>3</sub> triggers lysosome biogenesis via activation of calcineurin.** (A) Representative confocal images of fixed HeLa cells treated with control (SCR) or INPP5A siRNA (5AKD) treated with DMSO (-) or with 1 $\mu$ M Xestospongine C (Xesto) for 18 h and stained for CD63 (green). Blue, DAPI-stained nuclei. Scale bar, 20  $\mu$ m. (B) Representative confocal images of fixed HeLa cells with DMSO or with 1 $\mu$ M m-3M3-FBS for 24 h and stained with antibodies against CD63 (green) and LAMP1 (red). Blue, DAPI-stained nuclei. Scale bar, 25  $\mu$ m. (C) Representative confocal images of HeLa cells treated with control (SCR) or INPP5A siRNA (5AKD) treated with DMSO (-) or with 5 $\mu$ M CN585 for 24 h and stained with antibodies against CD63 (green). Blue, DAPI-stained nuclei. Scale bar, 10  $\mu$ m.

**Supplementary table 1 | Oligonucleotides used in this study**

| siRNA name                    | Sequence                 | Source        | Reference        |
|-------------------------------|--------------------------|---------------|------------------|
| Universal Negative Control #1 | n.a                      | Sigma MISSION | SIC001-10NMOL    |
| INPP5A#1                      | 5'-GCACCGCGCUUUGGAGUU-3' | Sigma MISSION | Customized       |
| ITPR1                         | n.a                      | Dharmacon     | L-006207-02-0005 |
| ITPR2                         | n.a                      | Dharmacon     | L-006208-02-0005 |
| ITPR3                         | n.a                      | Dharmacon     | L-006209-02-0005 |
| TFEB                          | n.a                      | Dharmacon     | L-009798-00-0005 |
| TFE3                          | n.a                      | Dharmacon     | L-009363-00-0005 |
| MCOLN1                        | n.a                      | Dharmacon     | L-006281-00-0005 |

| Name           | Sequence from 5' to 3'  |
|----------------|-------------------------|
| ATP6AP1 FW     | CAGCGACTTGCAGCTCTCTAC   |
| ATP6AP1 Rev    | TGAAATCCTCAATGCTCAGCTTG |
| CD63 FW        | CAGTGGTCATCATCGCAGTG    |
| CD63 Rev       | ATCGAAGCAGTGTGGTTGTTT   |
| LAMP1 Fw       | TCTCAGTGAAC TACGACACCA  |
| LAMP1 Rev      | AGTGTATGTCCTCTTCCAAAAGC |
| ASAH1 Fw       | AGATGTCATGTGGATAGGGTTCC |
| ASAH1 Rev      | GGGGCCAATATCTTGGTCTTG   |
| INPP5A-Fw      | ACACGAACATGGCACTAGGA    |
| INPP5A-Rev     | GGGCGTGCTCTCTAAGGTAT    |
| SQSTM1 P62 FW  | GCACCCCAATGTGATCTGC     |
| SQSTM1 P62 Rev | CGCTACACAAGTCGTAGTCTGG  |
| MAP1LC3A FW    | AACATGAGCGAGTTGGTCAAG   |
| MAP1LC3A Rev   | GCTCGTAGATGTCCGCGAT     |
| BCN1 FW        | CCATGCAGGTGAGCTTCGT     |
| BCN1 Rev       | GAATCTGCGAGAGACACCATC   |

**Supplementary table 2 | Antibodies used in this study**

| Antibody                         | Species | Dilution |         | Source                                  | Catalogue number |
|----------------------------------|---------|----------|---------|-----------------------------------------|------------------|
|                                  |         | ICC      | IB      |                                         |                  |
| <b>Primary antibodies</b>        |         |          |         |                                         |                  |
| CD63                             | ms      | 1:200    |         | Millipore                               | cb1553           |
| GM130                            | ms      | 1:200    |         | BD transduction                         | 610822           |
| LAMP1                            | Rb      | 1:200    |         | Cell signaling                          | 9091P            |
| EEA1                             | ms      | 1:100    |         | BD transduction                         | 610456           |
| Calreticulin                     | Rb      | 1:500    |         | ThermoFisher                            | PA 3-900         |
| b1-Integrin                      | Ms      | 1:200    |         | BD transduction                         | 610467           |
| phospho-P70 S6 Kinase T389       | Rb      |          | 1:1000  | Cell signaling                          | 9234             |
| P70 S6 Kinase                    | Rb      |          | 1:1000  | Cell signaling                          | 2708             |
| LC3                              | Rb      | 1:200    | 1:1000  | Sigma                                   | 8918             |
| sqstm1/p62                       | Ms      |          | 1:5000  | Abcam                                   | ab56416          |
| BIP                              | Rb      |          | 1:1000  | Cell signaling                          | 3177             |
| Phospho-PERK (Thr980)            | Rb      |          | 1:1000  | Cell signaling                          | 3179             |
| PERK                             | Rb      |          | 1:1000  | Cell signaling                          | 5683             |
| phospho ERK                      | Ms      |          | 1:5000  | Sigma                                   | M8159            |
| ERK                              | Rb      |          | 1:2500  | Abcam                                   | ab17942-50       |
| INPP5A                           | Rb      |          | 1:500   | ProteinTech                             | 21723-1-AP       |
| MCOLN1                           | Rb      |          | 1:500   | Home made in Thomas Jentsch lab MDC/FMP |                  |
| TFEB                             | Ms      | 1:1000   |         | Santa Cruze                             | sc-101532        |
| <b>Secondary antibodies</b>      |         |          |         |                                         |                  |
| $\alpha$ -ms IgG (H+L) AF488     | gt      | 1:400    |         | Thermo Fisher                           | A11029           |
| $\alpha$ -rb IgG (H+L) AF488     | gt      | 1:400    |         |                                         | A11034           |
| $\alpha$ -rb IgG (H+L) AF647     | gt      | 1:400    |         |                                         | A21244           |
| $\alpha$ -ms IgM (H+L) AF568     | gt      | 1:400    |         |                                         | A21043           |
| $\alpha$ -rb IRDye680RD IgG(H+L) | gt      |          | 1:10000 | LI-COR Biosciences                      | 926 -68071       |
| $\alpha$ -rb IRDye800RD IgG(H+L) | gt      |          | 1:10000 |                                         | 926 -32211       |
| $\alpha$ -ms IRDye680RD IgG(H+L) | gt      |          | 1:10000 |                                         | 925 -68070       |
| $\alpha$ -ms IRDye800RD IgG(H+L) | gt      |          | 1:10000 |                                         | 926 -32210       |
